# Supplementary material for: How Do Avalanche Dogs (and Their Handlers) Cope with Physical Exercise? Heart Rate Changes during Endurance in a Snowy Environment
Source: MDPI journal article supplement (doi:10.3390/ani12020168), 2022-01-11
Supplement: s1 [file s1]

Supplementary materials

Table S1: Demographic characteristics of dogs.

| ID | Working Area          | Age (years) | Experience (years) | Body Weight | Sex |
|----|-----------------------|-------------|--------------------|-------------|-----|
| 1  | Trentino              | 48          | 17                 | 63          | ♂   |
| 2  | Piemonte              | 54          | 28                 | 76          | ♂   |
| 3  | Piemonte              | 51          | 27                 | 70          | ♂   |
| 4  | Trentino              | 49          | 25                 | 78          | ♂   |
| 5  | Veneto                | 43          | 10                 | 61          | ♂   |
| 6  | Val d’Aosta           | 54          | 30                 | 68          | ♂   |
| 7  | Trentino              | 63          | 32                 | 72          | ♂   |
| 8  | Trentino              | 54          | 29                 | 95          | ♂   |
| 9  | Friuli Venezia Giulia | 54          | 17                 | 72          | ♂   |
| 10 | Trentino              | 52          | 25                 | 73          | ♂   |
| 11 | Trentino              | 54          | 15                 | 78          | ♂   |
| 12 | Trentino              | 42          | 10                 | 78          | ♂   |
| 13 | Piemonte              | 46          | 10                 | 65          | ♂   |

**Table S2:** Dogs’ demographic characteristics.

| ID | Breed            | Age (years) | Body weight (Kg) | Sex | Neutering |
|----|------------------|-------------|------------------|-----|-----------|
| 1  | German Shepherd  | 9           | 29               | ♀   | No        |
| 2  | Belgian Malinois | 8           | 34               | ♂   | No        |
| 3  | Belgian Malinois | 8           | 27               | ♀   | No        |
| 4  | Belgian Malinois | 4           | 30               | ♂   | No        |
| 5  | German Shepherd  | 7           | 34               | ♂   | No        |
| 6  | Border collie    | 3           | 24               | ♂   | No        |
| 7  | Mixed bred       | 3           | 42               | ♀   | No        |
| 8  | Border collie    | 5           | 27               | ♂   | No        |
| 9  | German Shepherd  | 9           | 35               | ♂   | No        |
| 10 | German Shepherd  | 5           | 38               | ♂   | No        |
| 11 | Belgian Malinois | 5           | 33               | ♂   | No        |
| 12 | German Shepherd  | 7           | 36               | ♂   | No        |
| 13 | Border collie    | 6           | 29               | ♂   | No        |

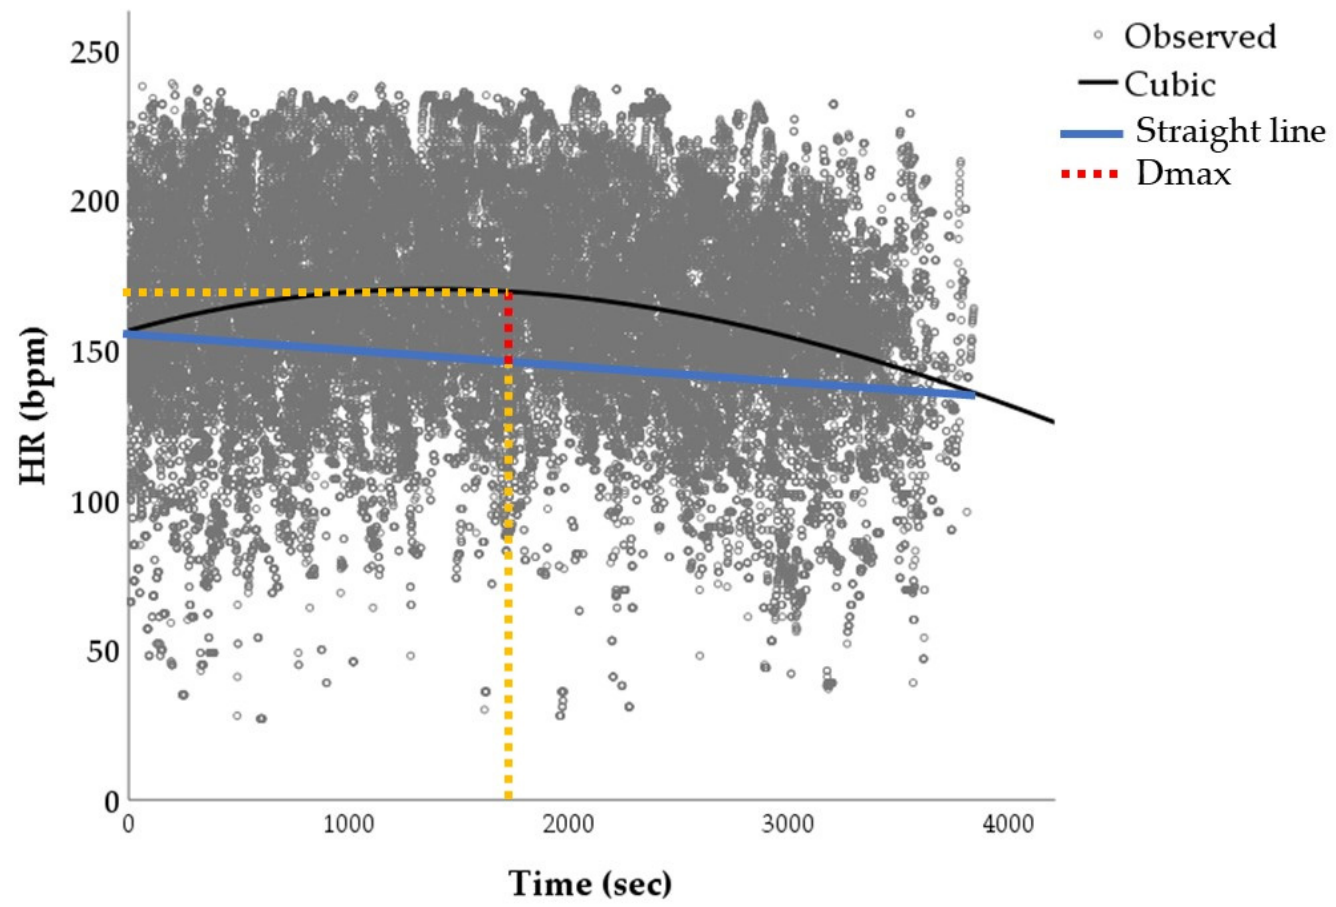

**Figure S1.** Effect of altitude on  $\% \Delta$  HR of handlers. Deflection point (HRdp; dashed line) determined via Dmax method on pooled data. In brief, the third order curvilinear regression curve was calculated from HR values vs time (black line). Then, two end points of the curve were connected by a straight line (blue line) and the most distant point of the curve to the line (Dmax; red dashed line) was considered as the HRdp. The HRdp corresponded to the second 1752-1753 of the Endurance activity and an estimated HR of 170 bpm ( $\approx 70\%$  of  $HR_{\max}$ ).

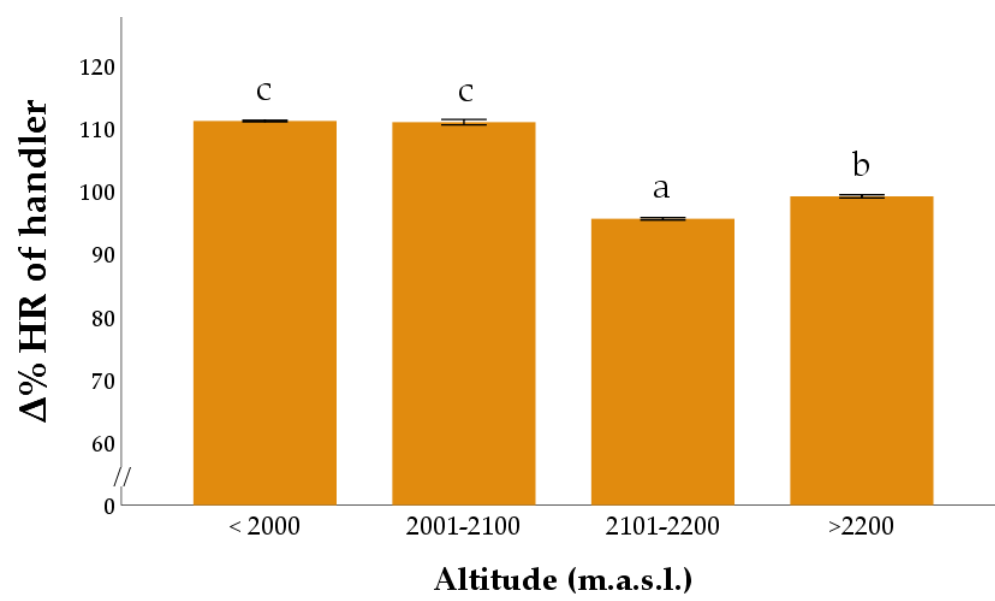

**Figure S2.** Effect of time intervals of *Endurance* activity on %Δ HR of handlers. Effect of Altitude on the percentage change from baseline (%Δ HR) of handlers. Values are marginal means ( $\pm$  standard errors). The model also included Gradient, Speed, and Gradient x Speed. Δ% HR was calculated second by second during the entire period of Endurance activity (mean duration = 56 minutes). Bars not sharing any superscript within each Altitude range are significantly different at  $P < 0.05$  (Bonferroni's correction).

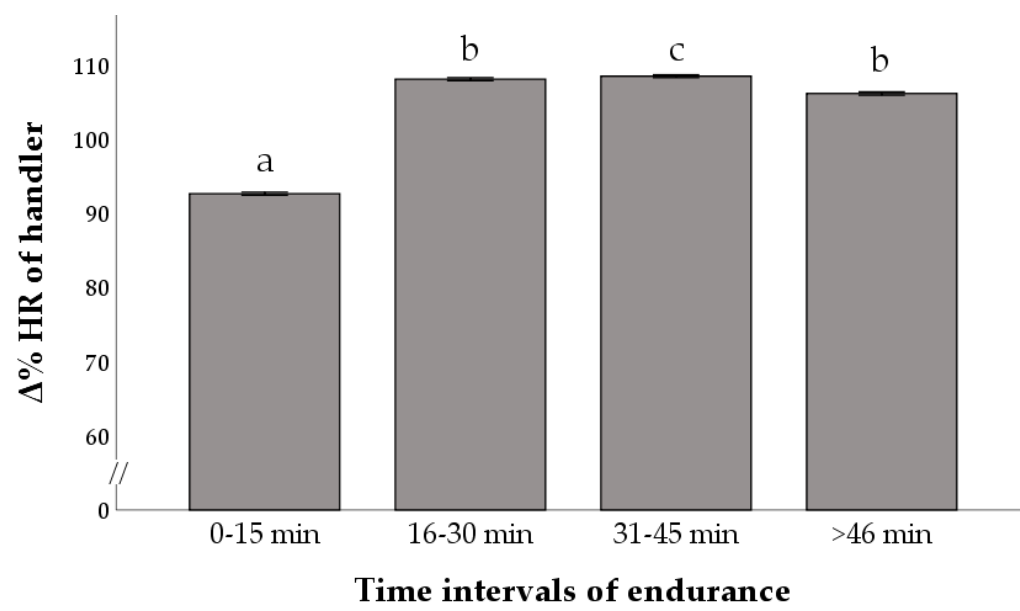

**Figure S3:** Effect of Time intervals of endurance on the percentage change from baseline (%Δ HR) of handlers. Values are marginal means ( $\pm$  standard errors). The model also included Gradient, Speed, and Gradient x Speed. Δ% HR was calculated second by second during the entire period of Endurance activity (mean duration = 56 minutes). Bars not sharing any superscript within each Time interval are significantly different at  $P < 0.05$  (Bonferroni's correction).
